# Supplementary material for: Compressive Garments in Individuals with Autism and Severe Proprioceptive Dysfunction: A Retrospective Exploratory Case Series
Source: PubMed Central journal article supplement (PMC7401870; doi:10.3390/children7070077), 2020-07-13
Supplement: children-07-00077-s001.pdf [file children-07-00077-s001.pdf]

**SUPPLEMENT MATERIAL**

**Impact of somatosensory orthoses on behavior and postural control in individuals with autism and severe proprioceptive dysfunction: a retrospective case series**

Guinchat et al.

**Table S1: Systematic search of Ehlers-Danlos Syndrome and retained diagnosis based on the criteria reported by *Malfait et al., 2017***

| Hypermobile EDS (hEDS) or Hypermobility Spectrum Disorder HSD criteria |                                 |           |                     |               |                    |                            |                |          |                                      |                |                                      |                       |                      |                |                                  |                                 |      |     |
|------------------------------------------------------------------------|---------------------------------|-----------|---------------------|---------------|--------------------|----------------------------|----------------|----------|--------------------------------------|----------------|--------------------------------------|-----------------------|----------------------|----------------|----------------------------------|---------------------------------|------|-----|
|                                                                        | Generalized joint hypermobility | Soft skin | Hyperextensive skin | Stretch marks | Piezogenic papules | Multiple abdominal hernias | Atrophic scars | Prolapse | Dental crowding, high, arched palate | Arachnodactyly | Arm span-to-height ratio $\geq 1.05$ | Mitral valve prolapse | Aortic root dilation | Family history | Muscular pain, joint dislocation | Differential diagnosis excluded | hEDS | HSD |
| P1                                                                     | 1                               | 1         | 0                   | 0             | 0                  | 0                          | 0              | 0        | 0                                    | 0              | 1                                    | 0                     | 0                    | 0              | ?                                | 1                               | N    | Y   |
| P2                                                                     | 1                               | 0         | 1                   | 1             | 0                  | 0                          | 0              | 0        | 1                                    | 1              | 1                                    | 0                     | 0                    | 0              | 1                                | 1                               | Y    | N   |
| P3                                                                     | 1                               | 0         | 1                   | 1             | 0                  | 0                          | 1              | 0        | 1                                    | 1              | 1                                    | 0                     | 0                    | 1              | ?                                | 1                               | Y    | N   |
| P4                                                                     | 1                               | 1         | 1                   | 0             | 0                  | 0                          | 0              | 0        | 0                                    | 1              | 1                                    | 0                     | 0                    | 0              | 1                                | 1                               | N    | Y   |
| P5                                                                     | 1                               | 1         | 1                   | 0             | 0                  | 0                          | 0              | 0        | 1                                    | 1              | 1                                    | 0                     | 0                    | 1              | 0                                | 1                               | Y    | N   |
| P6                                                                     | 1                               | 1         | 1                   | 0             | 0                  | 0                          | 0              | 0        | 0                                    | 0              | 0                                    | 1                     | 0                    | 0              | 1                                | 1                               | N    | Y   |
| P7                                                                     | 1                               | 0         | 1                   | 0             | 0                  | 0                          | 1              | 0        | 1                                    | 1              | 1                                    | 0                     | 0                    | 0              | 1                                | 1                               | Y    | N   |
| P8                                                                     | 0                               | 0         | 0                   | 1             | 0                  | 0                          | 0              | 0        | 0                                    | 0              | 0                                    | 0                     | 0                    | 0              | ?                                | 0                               | N    | N   |
| P9                                                                     | 0                               | 1         | 0                   | 1             | 0                  | 0                          | 0              | 0        | 0                                    | 0              | 0                                    | 0                     | 0                    | 0              | 0                                | 0                               | N    | N   |
| P10                                                                    | 0                               | 0         | 0                   | 0             | 0                  | 0                          | 0              | 0        | 0                                    | 0              | 0                                    | 0                     | 0                    | 0              | ?                                | 0                               | N    | N   |
| P11                                                                    | 0                               | 0         | 0                   | 0             | 0                  | 0                          | 0              | 0        | 1                                    | 1              | 0                                    | 0                     | 0                    | 0              | ?                                | 0                               | N    | N   |
| P12                                                                    | 0                               | 0         | 0                   | 0             | 0                  | 0                          | 0              | 0        | 0                                    | 0              | 0                                    | 0                     | 0                    | 0              | ?                                | 0                               | N    | N   |
| P13                                                                    | 0                               | 0         | 0                   | 0             | 0                  | 0                          | 0              | 0        | 0                                    | 0              | 0                                    | 0                     | 0                    | 0              | ?                                | 0                               | N    | N   |
| P14                                                                    | 0                               | 0         | 0                   | 0             | 0                  | 0                          | 0              | 0        | 0                                    | 0              | 0                                    | 0                     | 0                    | 0              | ?                                | 0                               | N    | N   |

0: absent criteria; 1: present criteria; ?: unknown (nonverbal subject or inability to name pain); hEDS: hypermobility Ehlers-Danlos syndrome; HSD: hypermobility spectrum disorder; N: no; Y: yes

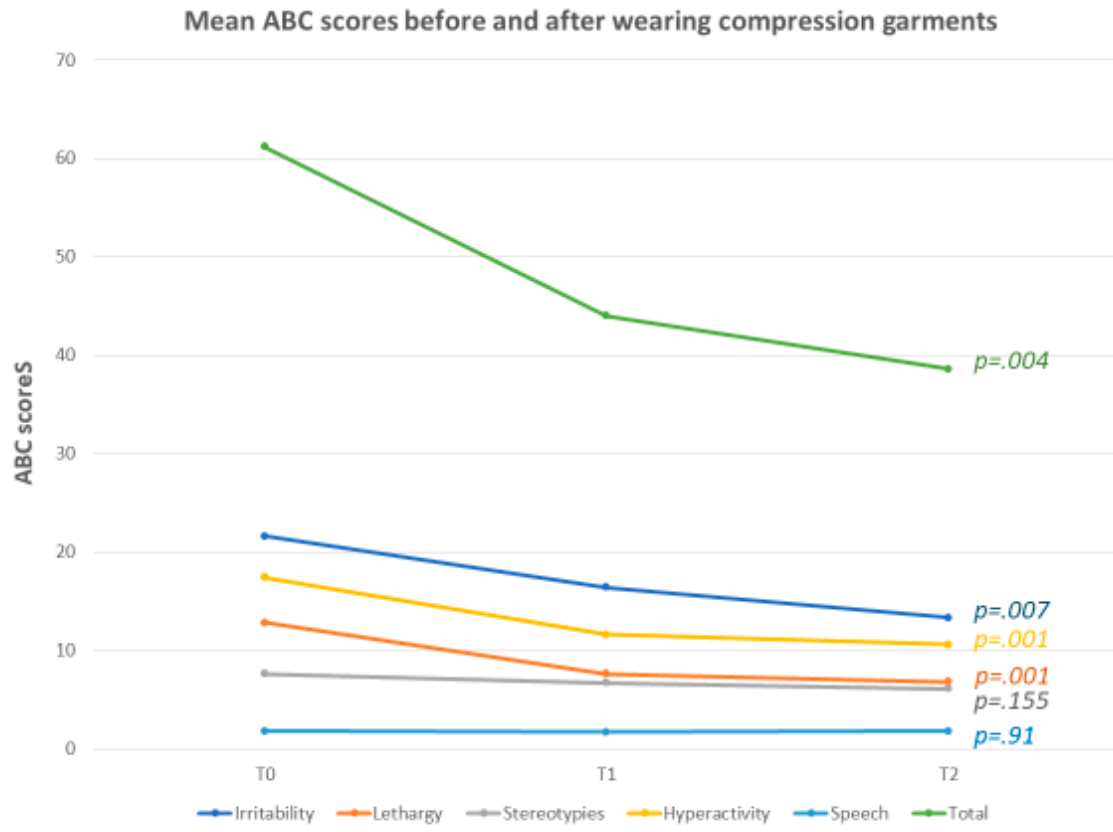

**Figure S1.** Changes in ABC total scores and subscores between baseline, 2 weeks (T1) and 6 weeks (T2).

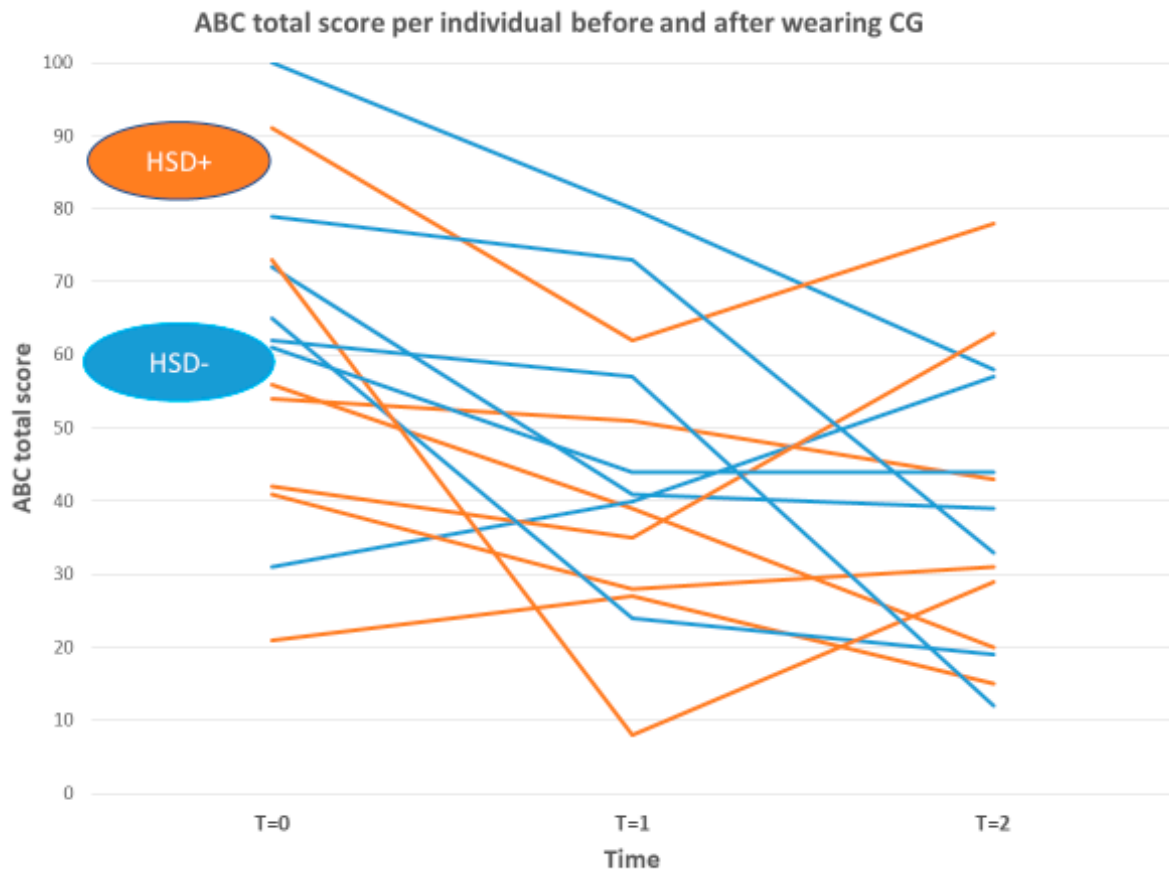

**Figure S2. ABC total scores per individual according to the joint hypermobility comorbidity.**

HSD: hypermobility spectrum disorder
